# Supplementary material for: One-pot synthetic route to homoallylketones via selective combination of alkyne, ethylene and aldehyde mediated by AlCl3 and zirconoceneElectronic supplementary information (ESI) available: experimental details. See http://www.rsc.org/suppdata/cc/b1/b109761j/
Source: Royal Society of Chemistry journal article supplement (doi:10.1039/b109761j), 2002-01-09
Supplement: b109761j.doc [file b109761j.doc]

# Supporting information for

One-pot synthetic route to homoallylketones via selective combination of alkyne, ethylene and aldehyde mediated by AlCl3 and zirconocene

**Representative procedure for the formation of compound 1a.** A 50ml Schlenk tube under dried nitrogen was charged with Cp2ZrCl2 (0.59g, 2mmol) and toluene (20ml). To this mixture at -78 oC was added ethylmagnesium bromide (1.0M THF solution, 4mmol, 4ml). After stirring for 1 h, 4-octyne (0.29ml, 2mmol) was added and the reaction mixture was stirred at 0 oC for 3h.1 Benzaldehyde (0.4ml, 4mmol) and freshly sublimed AlCl3 (0.54g, 4mmol) were then added at -78 oC to the above reaction mixture. The reaction mixture was warmed up to room temperature and stirred at the temperature for 1h. The above reaction mixture was then quenched with 3N HCl and extracted with ether. The extract was washed with water and brine and dried over MgSO4. The solvent was evaporated in vacuumto give a light yellow liquid. The liquid was subjected to silica gel column (1:1 petroleum and dichloromethane as the eluent). The final product was obtained as a colorless liquid 317mg (isolated yield 65%, GC yield 87%).

**Representative procedure for the preparation of compound 1aD**. The general procedure was the same as that of compound **1a**. The only difference was that herein the reaction mixture was quenched with DCl (20% in D2O, 2ml) for 2 h. Then the isolation procedure was followed to afford a colorless liquid, 314mg (isolated yield 64%, GC yield 85%) .

**Representative procedure for the preparation of compound 3a.** The procedure was the same as that for **1a** without hydrolysis. Copper chloride (0.2g, 2mmol) and allyl bromide (0.34ml, 4mmol) were added at -78 oC. The mixture was warmed up to room temperature and stirred for 3 h. Normal workup afforded the final product as a colorless liquid, 239mg ( isolated yield 42%, GC yield 60%).

**Compound 1a**. GC yield 87%, isolated yield 65% (317mg). 1H NMR (CDCl3, SiMe4) δ 0.89 (t, *J* = 7.2 Hz, 3H), 0.90 (t, *J* = 7.2 Hz, 3H), 1.26-1.48 (m, 4H), 1.94-2.07 (m, 4H), 2.41 (t, *J* = 6.6 Hz, 2H), 3.03-3.08 (m, 2H), 5.18 (t, *J* = 6.9Hz, 1H), 7.41-7.56 (m, 3H), 7.94-7.97 (m, 2H). 13C NMR (CDCl3, SiMe4)δ 13.86, 14.14, 21.63, 23.16, 29.87, 31.29, 32.43, 37.77, 125.60, 128.08, 128.56, 132.88, 137.15, 138.07, 200.29. HRMS calcd. for C17H24O 244.1827, found 244.1822.

**Compound 1b**. GC yield 76%, isolated yield 55% (300mg). 1H NMR (CDCl3, SiMe4) δ0.91 (t, *J* = 6.6 Hz, 6H), 1.29-1.36 (m, 8H), 1.98-2.08 (m, 4H), 2.41 (t, *J* = 7.2 Hz, 2H), 3.05 (t, *J* = 7.5 Hz, 2H), 5.15 (t, *J* = 7.2 Hz, 1H), 7.43-7.55 (m, 3H), 7.96 (d, *J* = 7.2 Hz, 2H). 13C NMR (CDCl3, SiMe4)δ14.04, 22.42, 22.83, 27.45, 30.11, 30.73, 31.31, 32.27, 37.76, 125.53, 128.08, 128.56, 132.88, 137.14, 138.11, 200.33. HRMS calcd. for C19H28O 272.2140, found 272.2134.

**Compound 1c**. GC yield 79%, isolated yield 51% (263mg). 1H NMR (CDCl3, SiMe4) δ0.89 (t, *J* = 7.2 Hz, 3H), 0.90 (t, *J* = 7.2 Hz, 3H), 1.30-1.46 (m, 4H), 1.94-2.06 (m, 4H), 2.40 (s, 3H), 2.37-2.43 (m, 2H), 3.03 (t, *J* = 7.8 Hz, 2H), 5.17 (t, *J* = 7.2 Hz, 1H), 7.24 (d, *J* = 7.8 Hz, 2H), 7.85 (d, *J* = 7.8 Hz, 2H). 13C NMR (CDCl3, SiMe4)δ13.88, 14.14, 21.61, 21.63, 23.17, 29.87, 31.38, 32.42, 37.66, 125.51, 128.21, 129.24, 134.65, 138.16, 143.59, 199.93. HRMS calcd. for C18H26O 258.1984, found 258.1973.

**Compound 1d.**  GC yield 81%, isolated yield 53% (297mg). 1H NMR (CDCl3, SiMe4) δ0.78-0.85 (m, 6H), 1.20-1.38 (m, 4H), 1.86-1.98 (m, 4H), 2.32 (t, *J* = 7.5 Hz, 2H), 2.95 (t, *J* = 7.8 Hz, 2H), 5.09 (t, *J* = 7.2 Hz, 1H), 7.35 (d, *J* = 8.4 Hz, 2H), 7.82 (d, *J* = 8.7 Hz, 2H). 13C NMR (CDCl3, SiMe4)δ13.82, 14.09, 21.58, 23.10, 29.81, 31.14, 32.36, 37.68, 125.71, 128.84, 129.46, 135.38, 137.83, 139.28, 198.97. HRMS calcd. for C17H23OCl 278.1437, found 278.1436.

**Compound 1e**. GC yield 78%, isolated yield 61% (394mg). 1H NMR (CDCl3, SiMe4) δ0.78-0.85 (m, 6H), 1.22-1.37 (m, 4H), 1.86-1.98 (m, 4H), 2.32 (t, *J* = 7.5 Hz, 2H), 2.94 (t, *J* = 7.5 Hz, 2H), 5.09 (t, *J* = 7.2 Hz, 1H), 7.52 (d, *J* = 8.4 Hz, 2H), 7.74 (d, *J* = 8.7 Hz, 2H).  13C NMR (CDCl3, SiMe4)δ13.82, 14.08, 21.57, 23.09, 29.81, 31.12, 32.35, 37.65, 125.71, 127.98, 129.57, 131.83, 135.77, 137.81, 199.16. HRMS calcd. for C17H23OBr 322.0932, found 322.0936.

**Compound 1f**. GC yield 74%, isolated yield 65% (362mg). 1H NMR (CDCl3, SiMe4) δ0.88 (t, *J* = 7.5 Hz, 3H), 0.90 (t, *J* = 7.2 Hz, 3H), 1.27-1.43 (m, 4H), 1.93-2.03 (m, 4H), 2.38 (t, *J* = 7.5 Hz, 2H), 3.04 (t, *J* = 7.2 Hz, 2H), 5.14 (t, *J* = 7.2 Hz, 1H), 7.26-7.43 (m, 4H). 13C NMR (CDCl3, SiMe4)δ 13.88, 14.12, 21.55, 23.13, 29.86, 31.10, 32.37, 41.95, 125.76, 126.86, 128.89, 130.42, 130.78, 131.48, 137.61, 139.77, 203.51. HRMS calcd. for C17H23OCl 278.1437, found 248.1440.

**Compound 1g**. GC yield 70%, isolated yield 48% (240mg). 1H NMR (CDCl3, SiMe4) δ 0.78-0.86 (m, 6H), 1.11-1.38 (m, 4H), 1.87-1.99 (m, 4H), 2.34 (t, *J* = 7.2 Hz, 2H), 2.91 (t, *J* = 7.5 Hz, 2H), 5.11 (t, *J* = 7.2 Hz, 1H), 7.04-7.07 (m, 1H), 7.54-7.65 (m, 2H). 13C NMR (CDCl3, SiMe4)δ13.81, 14.10, 21.57, 23.09, 29.82, 31.56, 31.63, 32.31, 38.59, 125.78, 127.99, 131.65, 133.32, 137.82, 144.46, 193.18. HRMS calcd. for C15H22OS 250.1391, found 250.1385.

**Compound 1h**. GC yield 70%, isolated yield 59% (298mg). 1H NMR (CDCl3, SiMe4) δ 0.78-0.84 (m, 9H), 1.21-1.49 (m, 12H), 1.85-1.94 (m, 4H), 2.17 (t, *J* = 7.2 Hz, 2H), 2.33 (t, *J* = 7.5 Hz, 2H), 2.42 (t, *J* = 7.2 Hz, 2H),5.04 (t, *J* = 7.2 Hz, 1H). 13C NMR (CDCl3, SiMe4)δ13.81, 13.99, 14.08, 21.53, 22.47, 23.12, 23.79, 28.93, 29.78, 30.78, 31.60, 32.30, 41.72, 42.87, 125.38, 137.95, 211.27. HRMS calcd. for C17H32O 252.2453, found 252.2446.

**Compound 1aD**. GC yield 85%, isolated yield 64% (314mg). 1H NMR (CDCl3, SiMe4) δ0.86-0.93 (m, 6H), 1.26-1.46 (m, 4H), 1.95-2.07 (m, 4H), 2.39 (s, 2H), 7.42-7.56 (m, 3H), 7.95 (d, *J* = 7.2 Hz, 2H). 13C NMR (CDCl3, SiMe4)δ13.88, 14.15, 21.63, 23.15, 29.77, 31.16, 32.41, 37.08-37.75 (m, CD2), 125.22 (t, *J* = 22.9 Hz, CD), 128.09, 128.57, 132.88, 137.14, 137.96, 200.36. HRMS calcd. for C17H21OD3 247.2016, found 247.2010.

**Compound 1bD**. GC yield 82%, isolated yield 58% (314mg). 1H NMR (CDCl3, SiMe4) δ0.78-0.85 (m, 6H), 1.01-1.33 (m, 8H), 1.91-2.00 (m, 4H), 2.33 (s, 2H), 7.34-7.49 (m, 3H), 7.86-7.88 (m, 2H). 13C NMR (CDCl3, SiMe4)δ13.98, 22.35, 22.76, 27.27, 30.01, 30.67, 31.10, 32.17, 37.16-37.65 (m, CD2), 125.05 (t, *J* = 23.5, CD), 128.02, 128.50, 132.82, 137.05, 137.93, 200.29. HRMS calcd. for C19H25OD3 275.2329, found 275.2321.

**Compound 3a**. GC yield 60%, isolated yield 42% (239mg). 1H NMR (CDCl3, SiMe4) δ0.84-0.95 (m, 6H), 1.26-1.46 (m, 4H), 1.97-2.07 (m, 4H), 2.42 (t, *J* = 8.1 Hz, 2H), 2.78 (m, 2H), 2.97-3.03 (m, 2H), 4.94-5.02 (m, 2H), 5.71-5.80 ( m, 1H), 7.43-7.58 (m, 3H), 7.94-7.97 (m, 2H). 13C NMR (CDCl3, SiMe4)δ14.34, 22.03, 22.32, 29.71, 33.87, 33.97, 36.08, 38.18, 114.67, 128.06, 128.56, 132.20, 132.92, 133.70, 137.03, 137.12, 200.40. HRMS calcd. for C20H28O 284.2140, found 284.2138.

References:

1. T. Takahashi, C. Xi, Z. Xi, M. Kageyama, R. Fischer, K. Nakajima and E. Negishi, *J. Org. Chem.*, 1998, **63**, 6802.
